# Supplementary material for: Calcium mobilization stimulatesDictyostelium discoideumshear-flow-induced cell motility
Source: Oxford University Press journal article supplement (doi:10.1242/jcs.02461), 2005-08-01
Supplement: jcs02461suptable_pdf.pdf [file jcs02461suptable_pdf.pdf]

## Supplementary Material

**Table S1. Ionic composition of the bathing fluid and SFICM**

Ax2 cells were introduced in the shear flow chamber in Sørensen buffer, then the buffer was exchanged for the indicated ones at low shear stress and after 3 min, high shear stress was applied ( $\sigma = 2.4$  Pa). SFICM was recorded and measured as explained in Materials and Methods. The first four solutions test for the involvement of  $\text{Na}^+$ ,  $\text{K}^+$ ,  $\text{Ca}^{2+}$  and  $\text{Mg}^{2+}$  in SFICM. The last fours show that  $\text{H}^+$  marginally influences SFICM. It should be noted that cells detach from the surface at pH larger than 7.5.

| Bathing solution                              | Speed ( $\mu\text{m}/\text{min}$ ) | Directionality |
|-----------------------------------------------|------------------------------------|----------------|
| 20 mM MES-NaOH, pH 6.5                        | $10 \pm 2$                         | $0.8 \pm 0.1$  |
| 20 mM MES-KOH, pH 6.5                         | $10.3 \pm 0.8$                     | $0.7 \pm 0.1$  |
| 20 mM MES-NaOH, pH 6.5 + 1 mM $\text{CaCl}_2$ | $26 \pm 2$                         | $0.9 \pm 0.1$  |
| 20 mM MES-NaOH, pH 6.5 + 1 mM $\text{MgCl}_2$ | $10 \pm 2$                         | $0.8 \pm 0.1$  |
| 20 mM MES-NaOH, pH 5.0                        | $3.5 \pm 0.5$                      | $0.7 \pm 0.2$  |
| 20 mM MES-NaOH, pH 5.5                        | $4.7 \pm 0.7$                      | $0.8 \pm 0.1$  |
| 20 mM MES-NaOH, pH 6.0                        | $10 \pm 2$                         | $0.8 \pm 0.1$  |
| 20 mM MES-NaOH, pH 7.0                        | $10 \pm 2$                         | $0.8 \pm 0.1$  |
